# Supplementary material
Source: PubMed Central journal article supplement (PMC2797999)
Supplement: NIHMS27970-supplement-2.pdf [file NIHMS27970-supplement-2.pdf]

## Supplementary Discussion

### Description of intra-heterotrimer interactions

One prominent feature of the TraN-TraO<sub>CT</sub> interface in the heterotrimer is the interaction between the proline-rich region at the N-terminus of TraN and the  $\beta$ 1-5 sheet of TraO<sub>CT</sub> (described in Supplementary Fig. 3c). These interactions direct the N-terminus of TraN towards the hydrophobic double-helical trans-membrane pore of TraF<sub>CT</sub>, positioning the lipid on TraN next to the pore.

The interface between TraF<sub>CT</sub> and TraO<sub>CT</sub> in the heterotrimer is formed by residues of TraF<sub>CT</sub> located in the  $\beta$ 2b and  $\beta$ 3a strands and in the extensive loop between these two strands (Supplementary Fig. 3f). These residues interact with TraO<sub>CT</sub> residues located in the C-terminus of the  $\alpha$ 1 helix, and in the C-terminal region of the extended loop between the  $\beta$ 9 and  $\beta$ 10 strands (Supplementary Fig. 3f).

### Description of the inter-heterotrimeric interactions

The interface between immediately adjacent TraF<sub>CT</sub> subunits will be described starting from the regions facing the outside of the ring structure (i.e. the  $\beta_n$ 1- $\beta$ 1a region; Supplementary Figs. 6c and 6d) progressing towards the  $\alpha$ 2 and  $\alpha$ 3 antenna helices. The  $\beta_n$ 1 strand in green in Supplementary Fig. 6c forms an edge strand added to the small  $\beta$ -sheet formed by the  $\beta$ 7c (with which  $\beta_n$ 1 interacts) and the  $\beta$ 1a strands at the base of the TraF<sub>CT</sub> subunit in red in Supplementary Fig. 6c. The linker sequence between  $\beta_n$ 1 and  $\beta$ 1a of the subunit in green makes interactions (M196) with residues in both the green (P204) and red (I279) subunits at the base of the interface. Further in, the bulk of the interface is made of residues in the extended  $\beta$ -sheet formed by the  $\beta$ 2a,  $\beta$ 3b,  $\beta$ 4, and  $\beta$ 5 strands in the subunit in red and residues in the  $\beta$ 1a- $\beta$ 1b and  $\beta$ 7b- $\beta$ 7c loops of the subunit

in green. At the top of the barrel, interactions are between residues in the  $\beta 1c$ - $\beta 2a$  loop of the subunit in red and residues in the  $\beta 3b$ - $\beta 4$  loop of the subunit in green. Interactions between the two antenna helices are described in the main text.

As mentioned in the main text, the extended N-terminal lever arm of TraF<sub>CT</sub> interacts extensively with 3 subunits. For example, and as depicted in Supplementary Fig. 6a, the arm of subunit F13 interacting with the subunit F14, F1, and F2. More generally, the arm of subunit FX ( $1 \leq X \leq 14$ ) interacts with the subunit FX+1, FX+2, and FX+3. The first set of contacts with an immediately adjacent subunit (FX+1) is mediated by residues in the  $\beta_n 1$  strand of the arm (see Supplementary Fig. 6c for the F1 subunit's arm in green). The second set of contacts is between residues in the  $\beta_n 1$ - $\alpha_n 1$  linker (the sequence between the  $\beta_n 1$  strand and the  $\alpha_n 1$  helix) and residues in the FX+2 subunit (see Supplementary Fig. 6d, where FX-FX+2 contacts are shown between the arm of the F13 subunit and the F1 subunit). Finally, the third set of contacts is between the  $\alpha_n 1$  helix and residues in the FX+3 subunit (see Supplementary Fig. 6d, where FX-FX+3 contacts are shown between the arm of subunit F12 and the F1 subunit).

The interface between adjacent TraO<sub>CT</sub> subunits consists of mostly loop residues on both sides (Supplementary Fig. 7a). The loop between the  $\beta 9$  and  $\beta 10$  strands contributes many residues to the interface (see F269, P271, R273, A275, and A277 of subunit O2 in forest-green in Supplementary Fig. 7b): these make contact with residues in the  $\beta 3$ - $\beta 4$  (A213, N214, A215) and in the  $\beta 6$ - $\beta 7$  (E239, N240) loops (in cyan in Supplementary Fig. 7b) of the adjacent TraO<sub>CT</sub> subunit. Additional contacts between TraO<sub>CT</sub> subunits include loop interactions between the  $\beta 1$ - $\beta 2$  and  $\beta 8$ - $\beta 9$  loop residues on

one side of the interface and  $\beta 4$ - $\beta 5$  loop residues on the other side of the interface (Supplementary Fig. 7b).

The interface between TraO<sub>CT</sub> of one heterotrimer and TraF<sub>CT</sub> of an adjacent heterotrimer in the tetradecameric assembly is extensive, involving 5 loops of TraF<sub>CT</sub>, three of which were defined in the ComB10<sub>CT</sub> structure as bulges (Supplementary Figs. 7a and 7c): the  $\beta 2a$ - $\beta 2b$  and  $\beta 4$ - $\beta 5$  loops, and the  $\beta 3a$ - $\beta 3b$ ,  $\beta 7a$ - $\beta 7b$ ,  $\beta 1b$ - $\beta 1c$  bulges. Residues in the  $\beta 2a$ - $\beta 2b$ ,  $\beta 3a$ - $\beta 3b$  and  $\beta 4$ - $\beta 5$  loop/bulge region interact with residues in the  $\beta 3$ - $\beta 4$ ,  $\beta 6$ - $\beta 7$  and  $\beta 8$ - $\beta 9$  loops of TraO<sub>CT</sub>. In the lower portion of this region (Supplementary Fig. 7c), a dense network of polar and charged residues characterises the interface (Q231, D232, D244, K245 in TraF<sub>CT</sub> and R241, E216, N214 in TraO<sub>CT</sub>). The upper portion of the same region is more hydrophobic, involving residues in the TraF<sub>CT</sub>  $\beta 7a$ - $\beta 7b$  and  $\beta 1b$ - $\beta 1c$  bulges and in the TraO<sub>CT</sub>  $\beta 4$  and  $\beta 5$  strands as well as  $\beta 5$ - $\beta 6$  and  $\beta 8$ - $\beta 9$  loops.

## Supplementary tables

Supplementary Table 1: Data collection and refinement statistics

|                                                     | ID14-4 (Native)                  | PROXIMA 1 (SAD)                  |
|-----------------------------------------------------|----------------------------------|----------------------------------|
| <b>Data collection</b>                              |                                  |                                  |
| Space group                                         | P2 <sub>1</sub> 2 <sub>1</sub> 2 | P2 <sub>1</sub> 2 <sub>1</sub> 2 |
| Cell dimensions                                     |                                  |                                  |
| <i>a, b, c</i> (Å)                                  | 204.15, 212.58,<br>204.07        | 202.4, 211.63,<br>203.44         |
| <i>a, b, g</i> (°)                                  | 90, 90, 90                       | 90, 90, 90                       |
| Resolution (Å)                                      | 59.6 - 2.8 (3.0-2.8)             | 52.91 - 2.6 (2.8-2.6)            |
| <i>R</i> <sub>merge</sub>                           | 12.3 (44.2)                      | 4.4 (14.2)                       |
| <i>I</i> / <i>σI</i>                                | 23.88(6.63)                      | 12.91(3.72)                      |
| Completeness (%)                                    | 100 (100)                        | 95.5 (94.7)                      |
| Redundancy                                          | 21.5 (17.8)                      | 1.98(1.98)                       |
| <b>Refinement<sup>a</sup></b>                       |                                  |                                  |
| Resolution (Å)                                      |                                  | 52 - 2.6                         |
| No. reflections                                     |                                  | 258767                           |
| <i>R</i> <sub>work</sub> / <i>R</i> <sub>free</sub> |                                  | 0.227/0.259                      |
| No. atoms                                           |                                  | 39253                            |
| Protein                                             |                                  | 37854                            |
| Ligand/ion                                          |                                  | 40 (1LDAO, 3MPD)                 |
| Water                                               |                                  | 1359                             |
| B-factors                                           |                                  |                                  |
| Protein                                             |                                  | 37.3                             |
| Ligand/ion                                          |                                  | 46.3                             |
| Water                                               |                                  | 46.4                             |
| R.m.s deviations                                    |                                  |                                  |
| Bond lengths (Å)                                    |                                  | 0.019                            |
| Bond angles (°)                                     |                                  | 1.98                             |

\*Highest resolution shell is shown in parenthesis.

$R_{\text{merge}} = \sum |I - \langle I \rangle| / \sum I$ , where *I* = observed intensity and  $\langle I \rangle$  = average intensity of multiple observations of symmetry-related reflections.

<sup>a</sup>The numbers indicated in the table are the results of the refinement using REFMAC<sup>31</sup>. Refinement using PHENIX<sup>32,33</sup> converges to *R*- and free*R*- factors of 0.172 and 0.195 with lower Rmsd stereochemistry numbers (0.008Å for bonds and 1.22 for angles), but higher overall B-factors (39Å<sup>2</sup>) and Rmsd B-factors between bonded atoms (2.16 for main chain atoms, and 4.0 for side chain atoms).

Supplementary Figures and legends

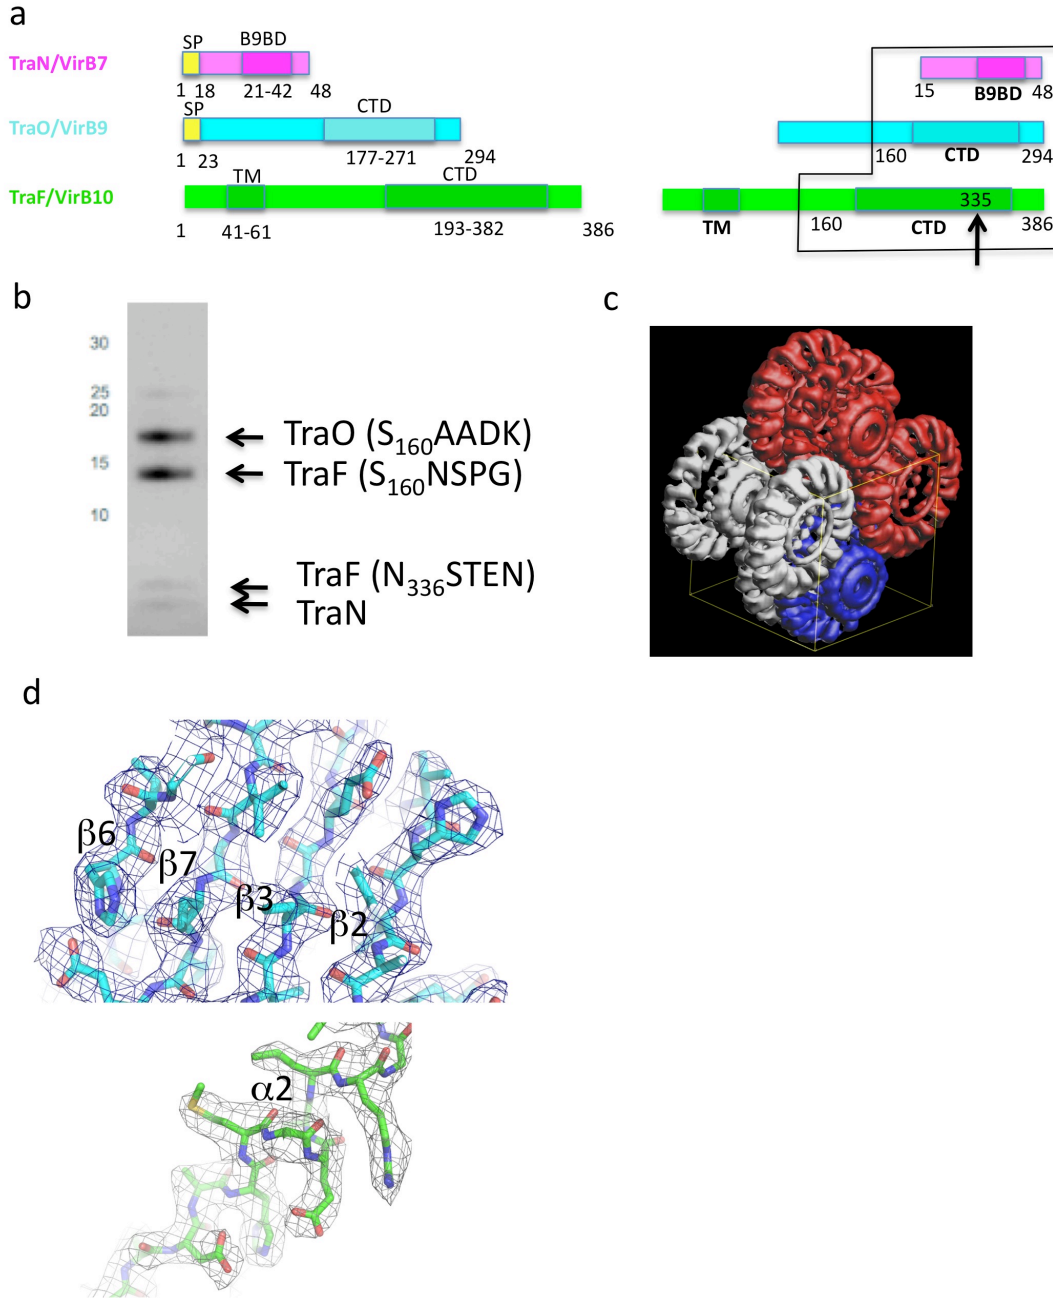

**Supplementary Figure 1.** Characterization of the T4SS outer membrane complex: Molecular biology, biochemistry, and structure. **a.** Schematic diagram of the constructs used in this study. Left panel: primary sequence and domain structure of TraN/VirB7,

TraO/VirB9, and TraF/VirB10. SP: signal peptide. TM: trans-inner membrane helix. B9BD: VirB9-binding domain. CTD: C-terminal domain. Right panel: schematic diagram illustrating the composition of the chymotryptic complex. The boxed area is what is left after chymotryptic cleavage of the T4SS core complex. The arrow indicates a single cut at residue 335 of TraF/VirB10. **b.** SDS-PAGE gel of the outer membrane complex. The various bands are identified and their N-terminal sequence (established using Edman degradation) is reported. **c.** Molecular Replacement-derived locations of the cryo-EM map of the trypsin-digested core complex in the unit cells of the crystals of the T4SS outer membrane complex. **d.** Representative regions of the experimental electron density map contoured at  $1.5\sigma$  after phase extension to  $2.8\text{\AA}$  resolution and 14-fold NCS averaging. Upper panel: the  $\beta 2-6$  sheet of TraO<sub>CT</sub>. Lower panel: the  $\alpha 2$  helix of TraF<sub>CT</sub>.

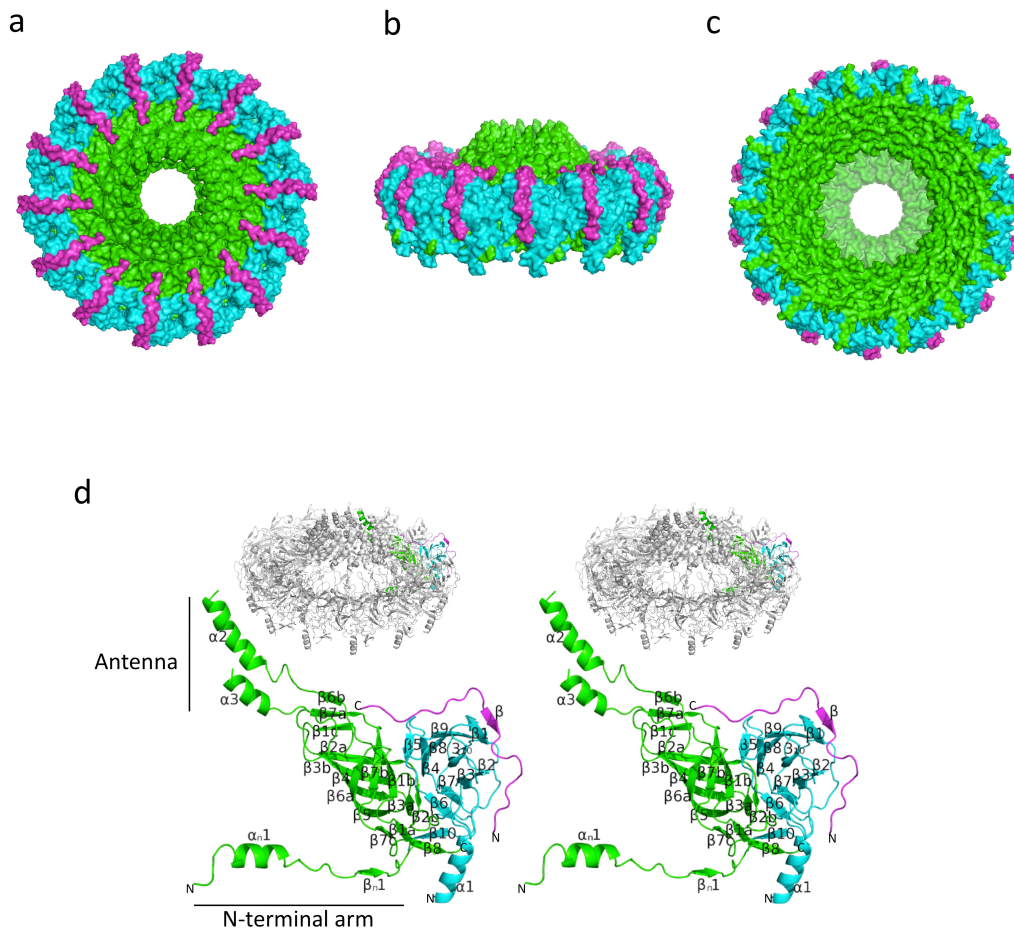

**Supplementary Figure 2.** Space-filling model of the T4SS outer membrane complex. **a.** Top-view from the extracellular milieu. **b.** Side view. **c.** Bottom view from the periplasm. **d.** Stereo version of Fig. 2.

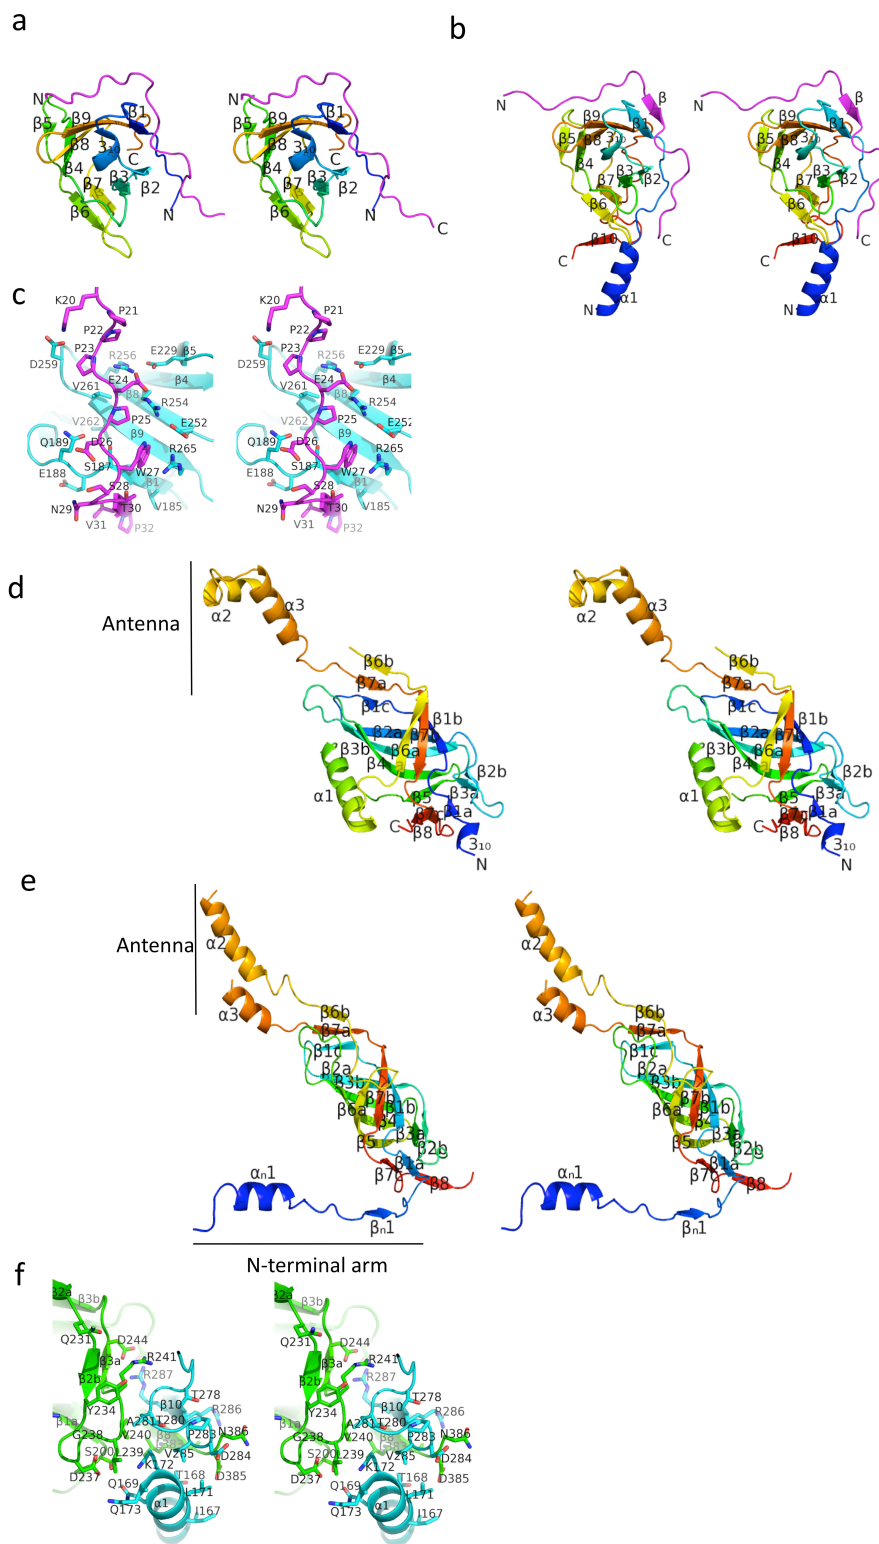

**Supplementary Figure 3.** Structures of and interactions between heterotrimeric components. **a.** NMR structure of the TraO<sub>CT</sub>-TraN complex<sup>11</sup> in ribbon diagram



representation. **b.** Structure of TraO<sub>CT</sub>-TraN complex in the outer membrane complex in ribbon diagram representation. **c.** Interactions of the proline-rich N-terminus of TraN (magenta) with TraO<sub>CT</sub>. Residues are in stick representation colour-coded in magenta (TraN) and cyan (TraO<sub>CT</sub>) for carbons, red for oxygens, blue for nitrogens and yellow for sulfurs. Residues shown are within 4.5Å from each other across the interface. **d.** Crystal structure of ComB10<sup>14</sup> in ribbon diagram representation. **e.** Structure of TraF<sub>CT</sub> in the heterotrimer (ribbon diagram representation). **f.** Example of interactions between TraF<sub>CT</sub> and TraO<sub>CT</sub>. Residues within 4.5Å across the interface are shown. Stick representations of residues are the same as in panel c, but for carbons of TraF<sub>CT</sub> that are shown in green.

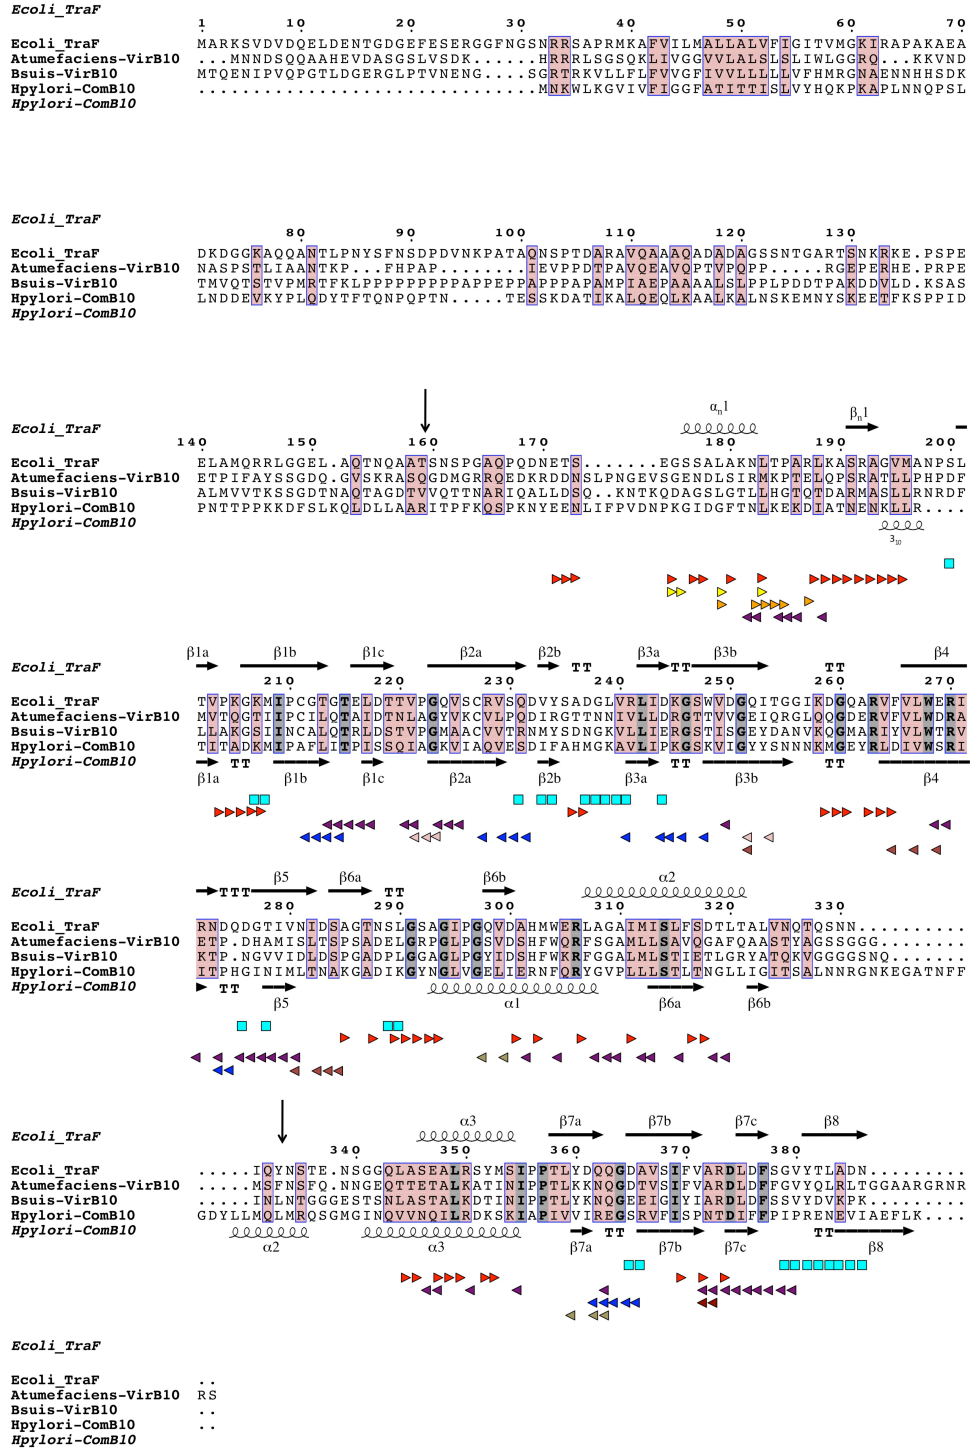

Supplementary Figure 4. Sequence alignment of VirB10 homologs. The sequences of TraF, *A. tumefaciens* VirB10, *B. suis* VirB10, and *H. pylori* ComB10 were aligned using

Clustalw<sup>34</sup>. The first vertical arrow above the sequence indicates the start of the TraF structure in the outer membrane complex. The second vertical arrow above the sequence indicates the location of the chymotrypsin cut between the two trans-membrane helices. Numbering above the sequence is that of TraF. Horizontal helices and arrows above the numbering indicate the positions of the secondary structures (helices and strands, respectively) as observed in the outer membrane complex. Labelling for those secondary structures is reported above the depiction of the secondary structures. Helices and arrows below the sequence alignment indicate the positions of helices and strands in the crystal structure of ComB10 (entry code 2BHV). Labelling for those secondary structures is reported under the depiction of the secondary structures. Cyan-filled square boxes indicate that the residues above them make intra-heterotrimeric interactions with TraO<sub>CT</sub> (i.e. interactions between subunits labelled F1 and O1 in Fig. 3a). Interactions between F1 residues and F2 residues are indicated by red forward triangles, while interactions between F1 and F14, F13, or F12 are indicated by backward triangles colour-coded with the colour used for the F14, F13, and F12 subunits in the schematic representation of Fig. 3a. This figure was made using ESPript<sup>35</sup>.

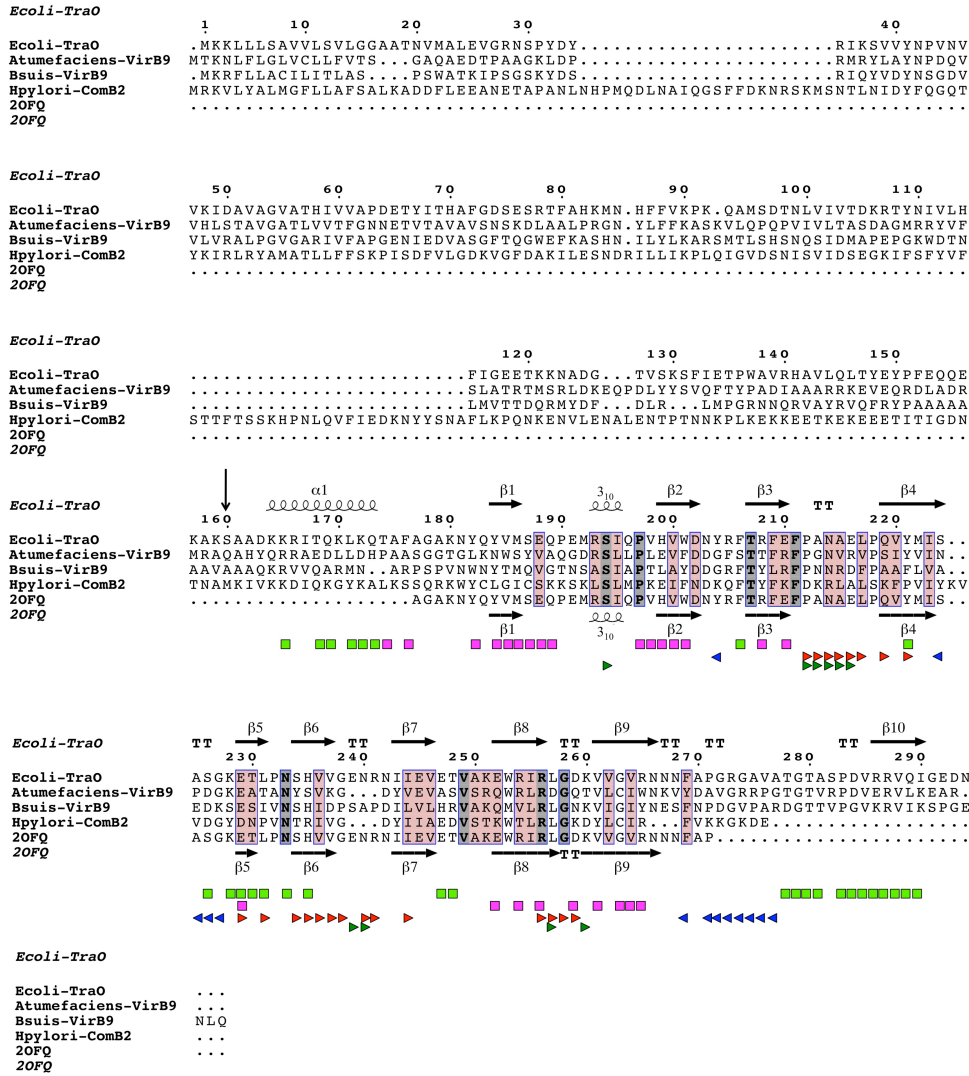

**Supplementary Figure 5.** Sequence alignment of VirB9 homologs. The sequences of TraO, *A. tumefaciens* VirB9, *B. suis* VirB9, and *H. pylori* ComB2 were aligned using Clustalw<sup>34</sup>. 20FQ is the sequence of TraO included in the pdb coordinates file (entry code 20FQ) for the NMR structure of the TraN/TraO complex. The vertical arrow above the sequence indicates the start of the TraO<sub>CT</sub> structure in the outer membrane complex. Numbering above the sequence is that of TraO. Horizontal helices and arrows above the numbering indicate the positions of the secondary structures (helices and strands, respectively) as observed in the outer membrane complex. Labelling for those secondary

structures is reported above the depiction of the secondary structures. Helices and arrows below the sequence alignment indicate positions of helices and strands as observed in the NMR structure (entry code 2OFQ). Labelling for those secondary structures is reported under the depiction of the secondary structures. Green- and magenta-filled square boxes indicate that the residues above them make intra-heterotrimeric interactions with TraF<sub>CT</sub> and TraN, respectively (i.e. interactions between subunit O1 and F1 (green) and between subunit O1 and N1 (magenta) in Fig. 3e). Interactions of O1 residues with F2 residues or with O2 residues (see Fig. 3e for definition of O1, O2, and F2) are shown in red and forest-green forward triangles, respectively. Interactions of O1 residues with O14 residue (see Fig. 3e for definition of the O14 subunit) are shown in dark blue backward triangles. This figure was made using ESPript<sup>35</sup>.

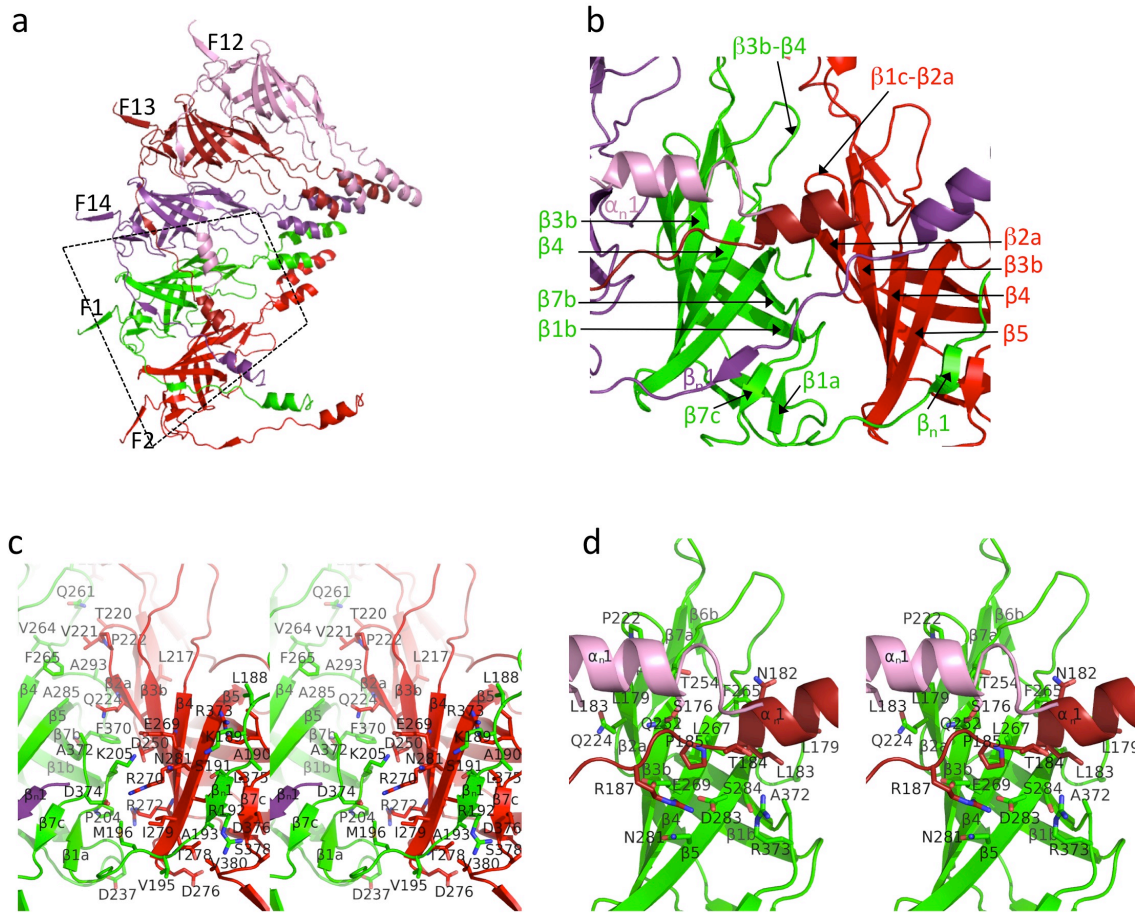

**Supplementary Figure 6.** Inter-heterotrimeric interactions between TraF<sub>CT</sub> subunits. **a.** Ribbon diagram of the F12 to F2 subunit regions of the T4SS outer membrane complex. The view is from the periplasm. The dashed line trapezoid indicates the region shown in panel b. **b.** Diagram of the region highlighted in panel a. Labels locate the secondary structures mentioned in the supplementary results. **c.** Stereo diagram of the interactions between immediately adjacent TraF<sub>CT</sub> subunits. Residues within 4.5 Å across the interface are shown. For clarity, the N-terminal arms of F14 and F13 have been partially removed. Residues are in stick representation, colour-coded in green (F1 subunit) and red (F2 subunit) for carbons, red for oxygens, blue for nitrogen, and yellow for sulfurs. **d.** Inter-heterotrimeric interactions between residues in the TraF<sub>CT</sub> F1 subunit (in green in panel a)

and residues of the N-terminal lever arm of TraF<sub>CT</sub> subunits F12 (pink) and F13 (brick red). See panel a for definition of the F1, F13, and F12 subunits. Residues within 4.5Å across the interface are shown.

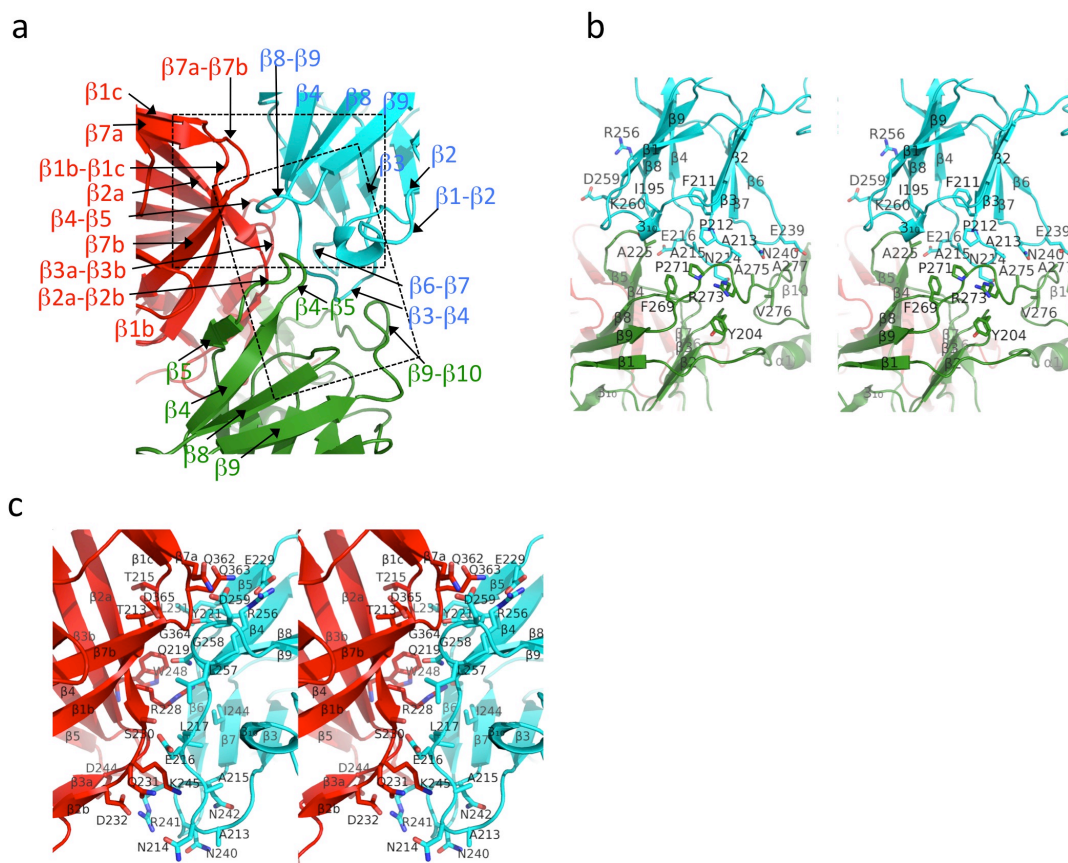

**Supplementary Figure 7.** Inter-heterotrimeric interactions involving the TraO<sub>CT</sub> subunit.

**a.** Ribbon diagram and labelling of the secondary structures at the interface between O1 (cyan) and O2 (forest-green), and between O1 and F2 (red). See Fig. 3e for definition of the O1, O2, and F2 subunits. Labels containing two secondary structure names refer to the loop or bulge between the two secondary structures. The straight and slanted dashed-lined rectangles indicate the regions detailed in panels b and c, respectively. **b.** Stereo diagram of interactions between adjacent TraO<sub>CT</sub> subunits. Residues within 4.5 Å across the interface are shown. Residues are in stick representation, colour-coded in forest-green (O2) and cyan (O1) for carbons, red for oxygens, blue for nitrogens, and yellow for sulfurs. **c.** Stereo diagram of interactions between subunit O1 (in cyan) and subunit F2 (in



red). Residues within 4.5Å across the interface are shown. Representation of residues is the same in panel d, except for F2 residue carbons that are in red.

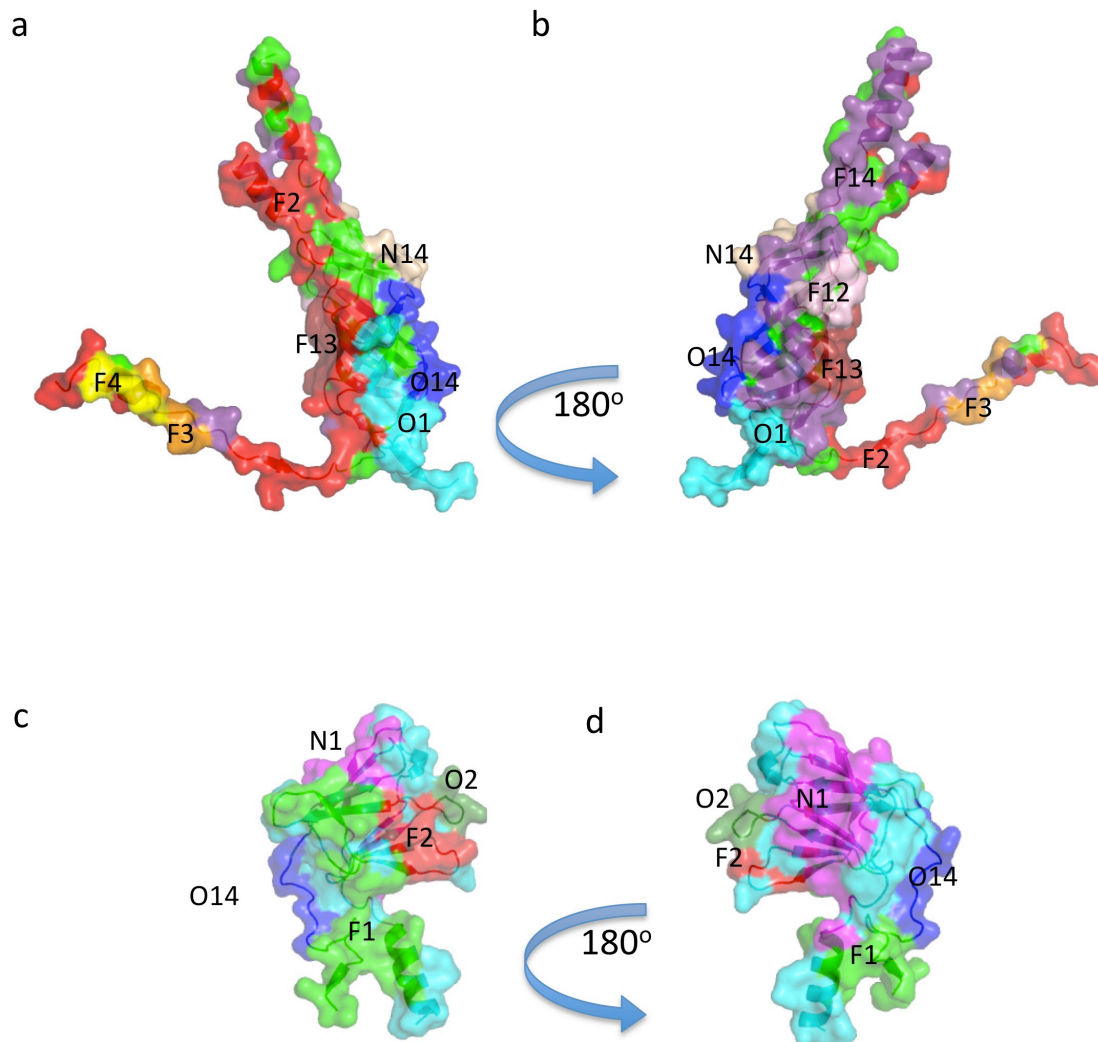

**Supplementary Figure 8.** Interaction surfaces of TraF<sub>CT</sub> and TraO<sub>CT</sub>. **a** and **b**. Two views related by 180° of the interactions surfaces of TraF<sub>CT</sub>. The surfaces are color-coded according to the interaction diagram of Fig. 3a and labelled accordingly. **c** and **d**. Two views related by 180° of the interactions surfaces of TraO<sub>CT</sub>. The surfaces are color-coded according to the interaction diagram of Fig. 3e and labelled accordingly.

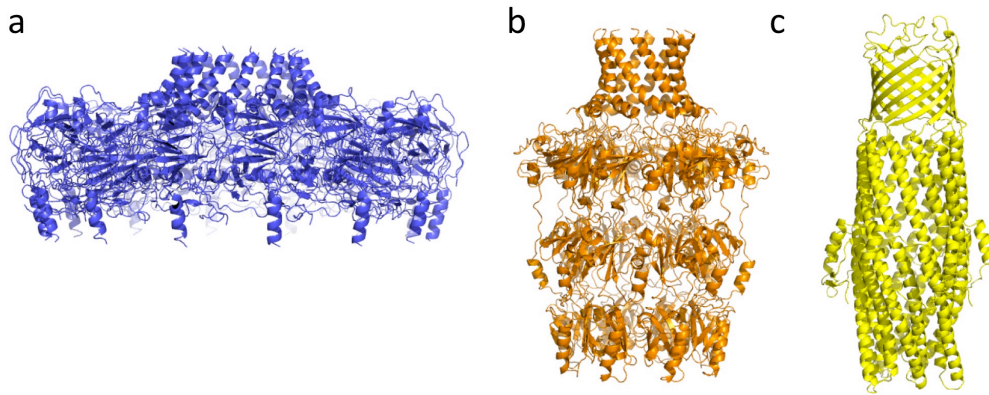

**Supplementary Figure 9.** Comparison of the structures of Wza and TolC with that of the T4SS outer membrane complex. All structures are in ribbon diagram representation. **a.** T4SS outer membrane complex. **b.** Wza. **c.** TolC.

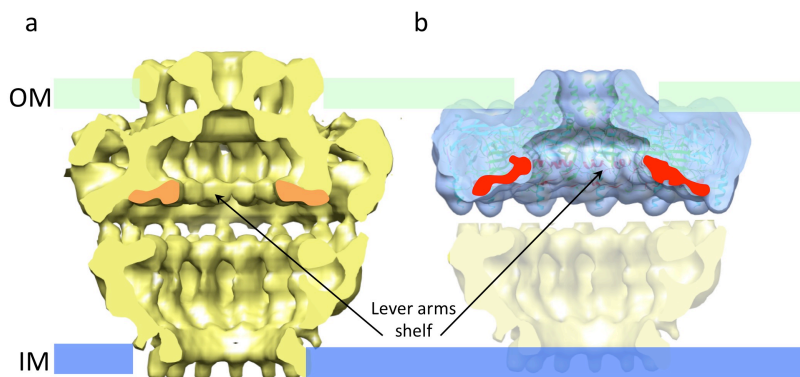

**Supplementary Figure 10.** Comparison of the Cryo-EM and crystal structure of the T4SS outer membrane complex. The structures superimposed in Fig. 4b of main text are here shown separately. **a.** Cut-away surface diagram of the T4SS core complex. The lever arms shelf is indicated in orange. **b.** Cut-away surface diagram of the T4SS outer membrane complex positioned where the O-layer is in the core complex. The lever arm shelf is indicated in red.

### Supplementary notes

- 34 Thompson, J., Higgins, D., & Gibson, T., CLUSTAL W: improving the sensitivity of progressive multiple sequence alignment through sequence weighting, position-specific gap penalties and weight matrix choice. *Nucleic Acids Research* **22**, 4673-4680 (1994).
- 35 Gouet, P., Robert, X., & Courcelle, E. ESPript/ENDscript: extracting and rendering sequence and 3D information from atomic structures of proteins. *Nucleic Acids Research*, **31**, 3320-3323 (2003).
